# Supplementary material for: Meiotic chromosome axis remodelling is critical for meiotic recombination in Brassica rapa
Source: PubMed Central journal article supplement (PMC8023211; doi:10.1093/jxb/erab035), 2021-01-27
Supplement: erab035_suppl_supplementary_tables_s1-s4_and_figures_s1-s3.pdf [file erab035_suppl_supplementary_tables_s1-s4_and_figures_s1-s3.pdf]

**Supplementary Table S1. Primers used in this study.** For dCAPS genotyping, restriction enzymes are indicated as well as corresponding fragment sizes after digestion. Highlighted nucleotides are non-complementary bases introduced to generate corresponding restriction sites.

| Gene                             | Primer name   | Sequence 5' to 3'                  | Restriction enzyme | Size restriction fragments (bp) |        |
|----------------------------------|---------------|------------------------------------|--------------------|---------------------------------|--------|
|                                  |               |                                    |                    | WT                              | Mutant |
| <b>dCAPS genotyping</b>          |               |                                    |                    |                                 |        |
| <i>PCH2-9</i>                    | PGF2          | TGTAGATGGCCTTGTTCATACCTC           | XbaI               | 224                             | 196+28 |
|                                  | P9R           | GGCATGGACAACAGGCTTAACCTTC          |                    |                                 |        |
| <i>PCH2-12</i>                   | PGF2          | TGTAGATGGCCTTGTTCATACCTC           | EcoRV              | 260                             | 232+28 |
|                                  | P12R          | CAGTGCCTTATTCAACTTTGCATAGATA       |                    |                                 |        |
| <i>ASY1-13</i>                   | A13F          | GAACCTTTAACTCCACTGCTGACATTAAT      | PacI               | 123                             | 94+29  |
|                                  | A13R          | GCACAATCACGAAAATTACAAAGCATG        |                    |                                 |        |
| <i>ASY1-14</i>                   | A14F          | CGGTTCTGCTCTAGGTAACAAGC            | EcoRI              | 185                             | 148+37 |
|                                  | A14R          | GCTAAAATCATTAGAATACAAAAACCTTCTGAAT |                    |                                 |        |
| <b>Reverse transcription-PCR</b> |               |                                    |                    |                                 |        |
| <i>Actin</i>                     | Actin_F       | GAGCAACTGGGATGACATGG               |                    |                                 |        |
|                                  | Actin_R       | GAAACCCTCGTAGATTGGCAC              |                    |                                 |        |
| <i>PCH2-12</i>                   | PCH2_RT_F1    | CTCGTCTCTGTGGAGGTCTG               |                    |                                 |        |
|                                  | PCH2_RT_R2    | GACCCAGTTCCTCACACG                 |                    |                                 |        |
| <b>T-DNA genotyping</b>          |               |                                    |                    |                                 |        |
| <i>asy1-4</i>                    | ASY1_F        | TCAGCTGGAGTTTTAGCTCG               |                    |                                 |        |
|                                  | ASY1_R        | GAACCATTTTGCAAGCTGAAC              |                    |                                 |        |
| <i>shoc1-1</i>                   | SHOC1_F       | AGCTTAAGCGAATCTTACCGG              |                    |                                 |        |
|                                  | SHOC1_R       | TGGTTCAATGGCTTTTGAAG               |                    |                                 |        |
| <i>mus81-2</i>                   | MUS81_F       | TGGTGAATCTAGCAACCCAG               |                    |                                 |        |
|                                  | MUS81_R       | AATTTCCACAAACCCTTTGG               |                    |                                 |        |
| <i>pch2-1</i>                    | PCH2_F        | CAGTGCAAATAGCCGTCGCTGAG            |                    |                                 |        |
|                                  | PCH2_R        | CTCACATGGTCCTTCTCAATGAGC           |                    |                                 |        |
| T-DNA                            | LB_salk_LB1.3 | ATTTTGCCGATTCGGAAC                 |                    |                                 |        |

**Supplementary Table S2. Plant fertility in *B. rapa* WT, *asy1* and *pch2* mutants.** Silique length and seed setting in *B. rapa* WT and in TILLING plants WT, heterozygous or mutant for *ASY1* and *PCH2* including allelic mutants. N = total number of siliques (10 siliques per plant).

|                    | Average silique length<br>(cm) | Average seed set | N   |
|--------------------|--------------------------------|------------------|-----|
| WT                 | 7.60 ± 0.61                    | 37.73 ± 6.73     | 120 |
| <i>ASY1-13</i> +/+ | 7.10 ± 0.60                    | 37.84 ± 4.94     | 50  |
| <i>ASY1-13</i> +/- | 7.48 ± 0.51                    | 36.02 ± 5.63     | 50  |
| <i>asy1-13</i>     | 2.80 ± 0.34                    | 0 ± 0            | 50  |
| <i>ASY1-14</i> +/+ | 7.49 ± 0.55                    | 37.32 ± 5.52     | 50  |
| <i>ASY1-14</i> +/- | 7.86 ± 0.65                    | 38.7 ± 6.58      | 50  |
| <i>asy1-14</i>     | 3.05 ± 0.67                    | 0 ± 0            | 50  |
| <i>asy1-13/14</i>  | 3.16 ± 0.20                    | 0 ± 0            | 50  |
| <i>PCH2-9</i> +/+  | 7.40 ± 0.50                    | 36.38 ± 4.22     | 50  |
| <i>PCH2-9</i> +/-  | 7.17 ± 0.41                    | 34.16 ± 5.39     | 50  |
| <i>pch2-9</i>      | 4.41 ± 1.01                    | 2.74 ± 3.60      | 50  |
| <i>PCH2-12</i> +/+ | 6.80 ± 0.56                    | 35.32 ± 8.09     | 50  |
| <i>PCH2-12</i> +/- | 6.56 ± 0.54                    | 33.20 ± 6.34     | 50  |
| <i>pch2-12</i>     | 3.19 ± 0.79                    | 1.02 ± 2.32      | 50  |
| <i>pch2-9/12</i>   | 4.28 ± 1.08                    | 3.22 ± 1.01      | 50  |

**Supplementary Table S3. Relative occurrence (%) of 5S/45S-labelled chromosomes as either univalents or bivalents.** Chromosome #3 formed a bivalent with significantly higher frequency than all other discernible chromosomes. N = 73 *asy1* diakinesis cells.

|           | <b>#1 (5S)</b> | <b>#3 (5S+45S)</b> | <b>#4 (5S+45S)</b> | <b>#5 (5S+45S)</b> | <b>#6 (45S)</b> | <b>#10 (5S)</b> |
|-----------|----------------|--------------------|--------------------|--------------------|-----------------|-----------------|
| Univalent | 84.93          | 36.76              | 79.45              | 84.93              | 86.30           | 82.19           |
| Bivalent  | 15.07          | 63.24              | 20.55              | 15.07              | 13.70           | 17.81           |

**Supplementary Table S4. ASY1 immunofluorescence relative signal intensity in WT and *pch2* cells. A.** Asynapsed vs synapsed regions. In *pch2*, ASY1 is not depleted from synapsed regions and remains brightly stained in pachytene cells. **B.** Whole leptotene nuclei. Initial ASY1 loading is impaired in *pch2*. Independent experiments performed with two independent microscopes. Values represent nuclei fluorescence intensity after deduction of background signal intensity (see methods). N = number of cells. Asterisks indicate significant differences (Student's *t* test,  $P < 0.05$ ).

A

| WT              |                |            | <i>pch-2</i>    |                 |            |
|-----------------|----------------|------------|-----------------|-----------------|------------|
| Asynapsed       | Synapsed       | Difference | Asynapsed       | Synapsed        | Difference |
| 1922.41<br>N=11 | 846.38<br>N=10 | -55% (*)   | 1758.09<br>N=16 | 2137.14<br>N=17 | +21% (*)   |

B

| Whole nuclei | WT              | <i>pch2</i>     | Difference |
|--------------|-----------------|-----------------|------------|
| Microscope 1 | 447.09<br>N=21  | 348.79<br>N=31  | -22% (*)   |
|              |                 | 346.84<br>N=8   | -22%       |
| Microscope 1 | 1392.20<br>N=23 | 331.07<br>N=23  | -76% (*)   |
| Microscope 2 | 3943.67<br>N=43 | 3388.21<br>N=21 | -14%       |

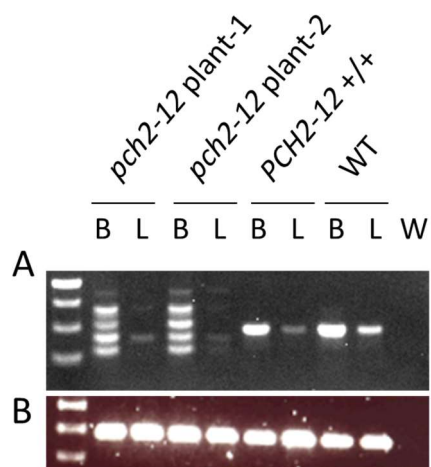

**Supplementary Fig. S1. Alternative splicing of *PCH2* in *pch2-12*.** Reverse transcription-PCR for *PCH2* in two independent mutant plants, one sibling TILLING plant WT for *PCH2* and one WT plant. **A.** Primer pair spanning the mutation site. Note alternative splicing variants in mutant plants only. **B.** Expression of actin as technical control. B: bud; L: leaf; W: water control.

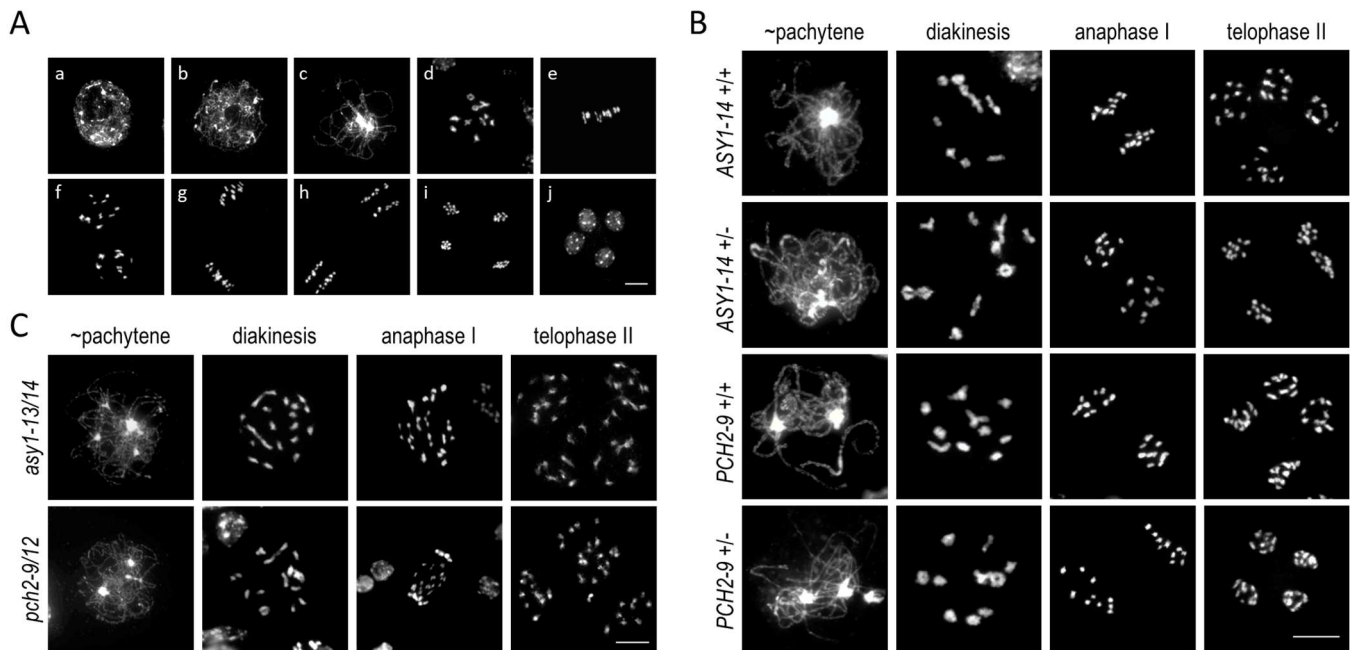

**Supplementary Fig. S2. Male meiotic chromosome behaviour in *B. rapa*.** **A.** Meiotic stages in *B. rapa* WT. **a.** Leptotene. **b.** Zygotene. **c.** Pachytene. **d.** Diakinesis. **e.** Metaphase I. **f.** Telophase I. **g.** Metaphase II. **h.** Anaphase II. **i.** Telophase II. **j.** Tetrad. **B.** WT meiosis in TILLING plants WT or heterozygous for *ASY1* and *PCH2*. **C.** Meiosis in the allelic mutants *asy1-13/14* and *pch2-9/12*. DNA counterstained with DAPI and shown in grey. Bars = 10µm.

A

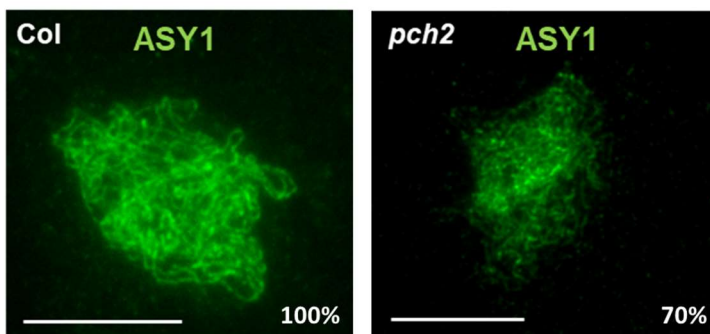

B

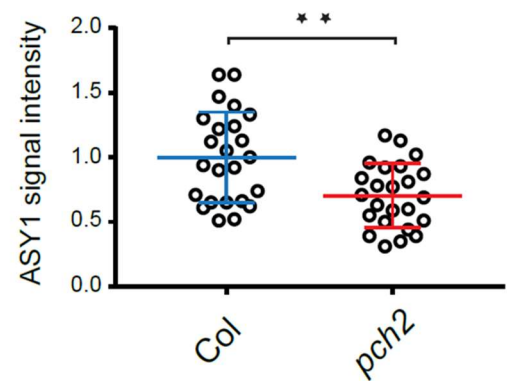

**Supplementary Fig. S3. Localization defect of ASY1 in Arabidopsis *pch2*.** **A.** Staining of ASY1 at leptotene in WT and *pch2*. ASY1 relative signal intensity indicated in the bottom right corner. Bars = 10 $\mu$ m. **B.** Plot showing relative ASY1 signal intensity in each background. Asterisks represent statistically significant differences (MWW test).
